# Supplementary material for: Between-Group Variation in Female Dispersal, Kin Composition of Groups, and Proximity Patterns in a Black-and-White Colobus Monkey (Colobus vellerosus)
Source: PLoS One. 2012 Nov 7;7(11):e48740. doi: 10.1371/journal.pone.0048740 (PMC3492432; doi:10.1371/journal.pone.0048740)
Supplement: Appendix S3 — VBA code for within-population simulations. VBA code and sample data in Microsoft Excel for within-population simulations. (XLSM) [file pone.0048740.s003.xls]

## Sheet: InputData
Name	CurrentGroup	AA	AB	AC	BA	BB	BC	CA	CB	CC
AA	1		0.0545	0.164	0.0439	0.1357	0.0046	0	0	0.2916
AB	1	0.0545		0.2612	0.0146	0.0862	0.0499	0.0079	0.0557	0.4368
AC	1	0.164	0.2612		0.0679	0.5925	0.0097	0	0.2182	0.2035
BA	2	0.0439	0.0146	0.0679		0.5925	0.7246	0.3597	0	0
BB	2	0.1357	0.0862	0.5925	0.5925		0.3325	0	0.1936	0.3198
BC	2	0.0046	0.0499	0.0097	0.7246	0.3325		0.3174	0	0.048
CA	3	0	0.0079	0	0.3597	0	0.3174		0	0
CB	3	0	0.0557	0.2182	0	0.1936	0	0		0.0636
CC	3	0.2916	0.4368	0.2035	0	0.3198	0.048	0	0.0636
